# Supplementary material
Source: Royal Society of Chemistry journal article supplement (doi:10.1039/d6nr01053a)
Supplement: d6nr01053a1.pdf [file d6nr01053a1.pdf]

# Supporting Information

## **Engineering interface-mediated heterojunction in MOF-derived C-In<sub>2</sub>O<sub>3</sub> microrods and CdS nanoclusters for enhanced photocatalytic H<sub>2</sub>O<sub>2</sub> production**

*Qipiao Zhang<sup>a#</sup>, Tao Lei<sup>a#</sup>, Hongli Yang<sup>a\*</sup>, Zihao Yuan<sup>a</sup>, Jiahao Song<sup>a</sup>, Enze Hu<sup>a</sup>, Hongfei Bao<sup>a</sup>,*

*Dongdong Zhang<sup>a</sup>, Huilin Hou<sup>a</sup>, Weiyu Yang<sup>a</sup>, Zhao Liang<sup>a\*</sup>, Xiaoqiang Zhan<sup>a\*</sup>*

*<sup>a</sup>Institute of Micro/Nano Materials and Devices, Ningbo University of Technology, Ningbo, 315211, P.*

*R. China*

---

\*Corresponding authors. E-mails: cumtmaterial@163.com (H. Yang) [walleliang@hnu.edu.cn](mailto:walleliang@hnu.edu.cn) (Z. liang) and zhanxiaoqiang777@163.com (X. Zhan)

# These authors contribute equally

Tel: +86-574-87080966, Fax: +86-574-87081221.

## Experimental Procedure

### Materials

Indium (III) nitrate hydrate ( $\text{In}(\text{NO}_3)_3 \cdot x\text{H}_2\text{O}$ , A.R., Aladdin), N, N-dimethylformamide (DMF, A.R., Aladdin), terephthalic acid ( $\text{H}_2\text{BDC}$ , A.R., Aladdin), Cadmium acetate ( $(\text{CH}_3\text{COO})_2\text{Cd}$ , A.R., Aladdin), Sodium sulfide ( $\text{Na}_2\text{S} \cdot 9\text{H}_2\text{O}$ , A.R., Aladdin), Ethanol anhydrous ( $\text{CH}_3\text{CH}_2\text{OH}$ , 99.7%, Macklin), potash iodide (KI, A.R., Aladdin), Potassium acid phthalate ( $\text{C}_8\text{H}_5\text{O}_4\text{K}$ , AR, Macklin), Hydrogen peroxide (30%, AR, XILONG SCIENTIFIC), deionized water (Millipore, 18.2  $\text{M}\Omega$  cm). The above chemicals were used directly and no further purification was carried out.

## Characterization

Field emission scanning electron microscopy (FESEM) (Hitachi, Japan) transmission electron microscopy (TEM), and high-resolution transmission electron microscopy (HRTEM) using the JEOL JEM-F200 (Japan) were hired to observe the microstructure and morphology of the samples. X-ray power diffraction (XRD) patterns were obtained using the Bruker D8 Advance instrument from Germany with Cu K $\alpha$  radiation ( $\lambda = 1.5406 \text{ \AA}$ ) to determine the crystal structures. X-ray photoelectron spectroscopy (XPS) was conducted using the Thermo Fisher Scientific ESCALAB 250Xi instrument from America to analyze the surface species and chemical states. Diffuse reflectance absorption spectra were measured on a Hitachi UV-3900 UV-visible spectrophotometer with an integrated sphere attachment, employing BaSO<sub>4</sub> as the reflectance standard. The specific surface area of the materials was calculated using the adsorption data in the pressure range of  $P/P_0 = 0 - 1$  by the Brunauer-Emmett-Teller (BET) model. Pore size distribution was obtained by the Barrett-Joyner-Halenda (BJH) model using the adsorption branch of the isotherm. The room temperature electron paramagnetic resonance (EPR) spectra of the samples were measured by Bruker EMXplus-6/1. Photoluminescence (PL) spectra were measured on Edinburgh FLS1000 fluorescence spectrometer with an excitation wavelength of 350 nm. Time-resolved photoluminescence (TRPL) spectra were collected on Edinburgh FLS1000 fluorescence spectrometer with an excitation wavelength of 470 nm.

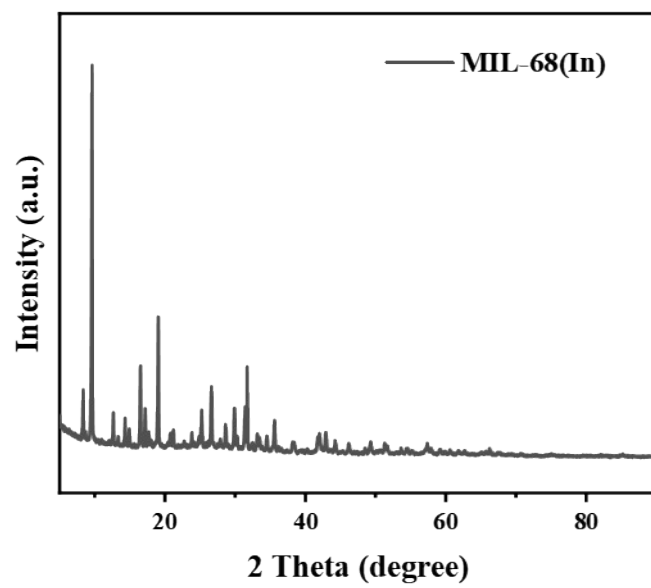

**Fig. S1** XRD spectra of as-prepared MIL-68(In).

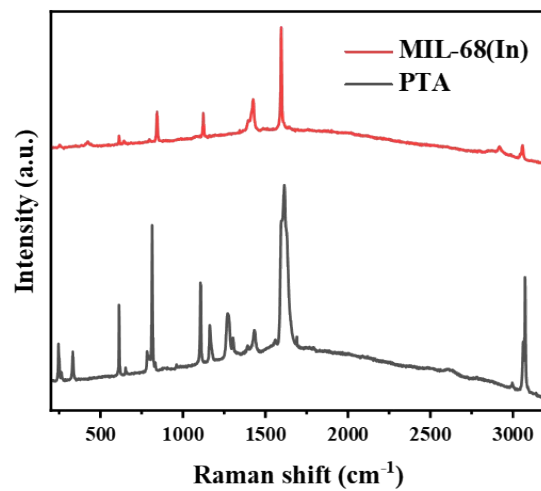

**Fig. S2** Raman spectra of as-prepared MIL-68(In) and PTA.

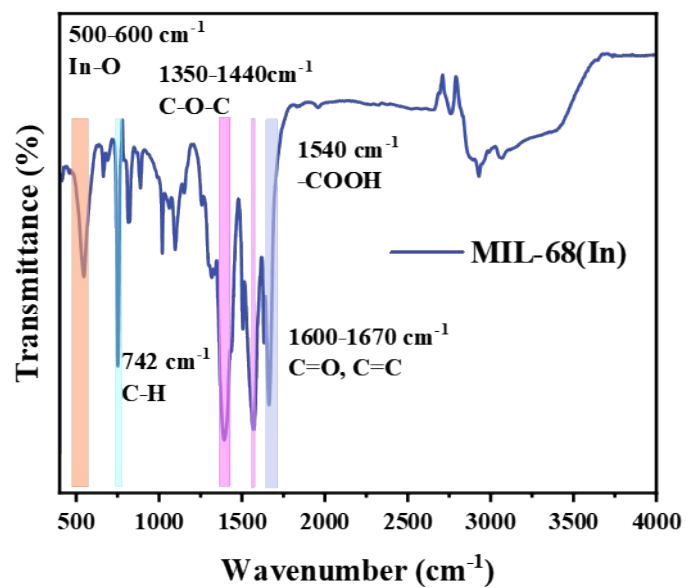

Fig. S3 FT-IR spectra of as-prepared MIL-68(In).

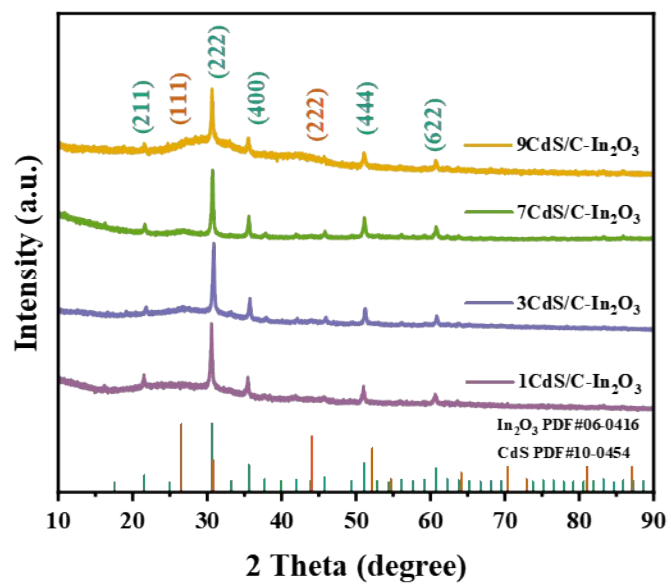

Fig. S4 XRD patterns of as-prepared CdS/C-In<sub>2</sub>O<sub>3</sub>

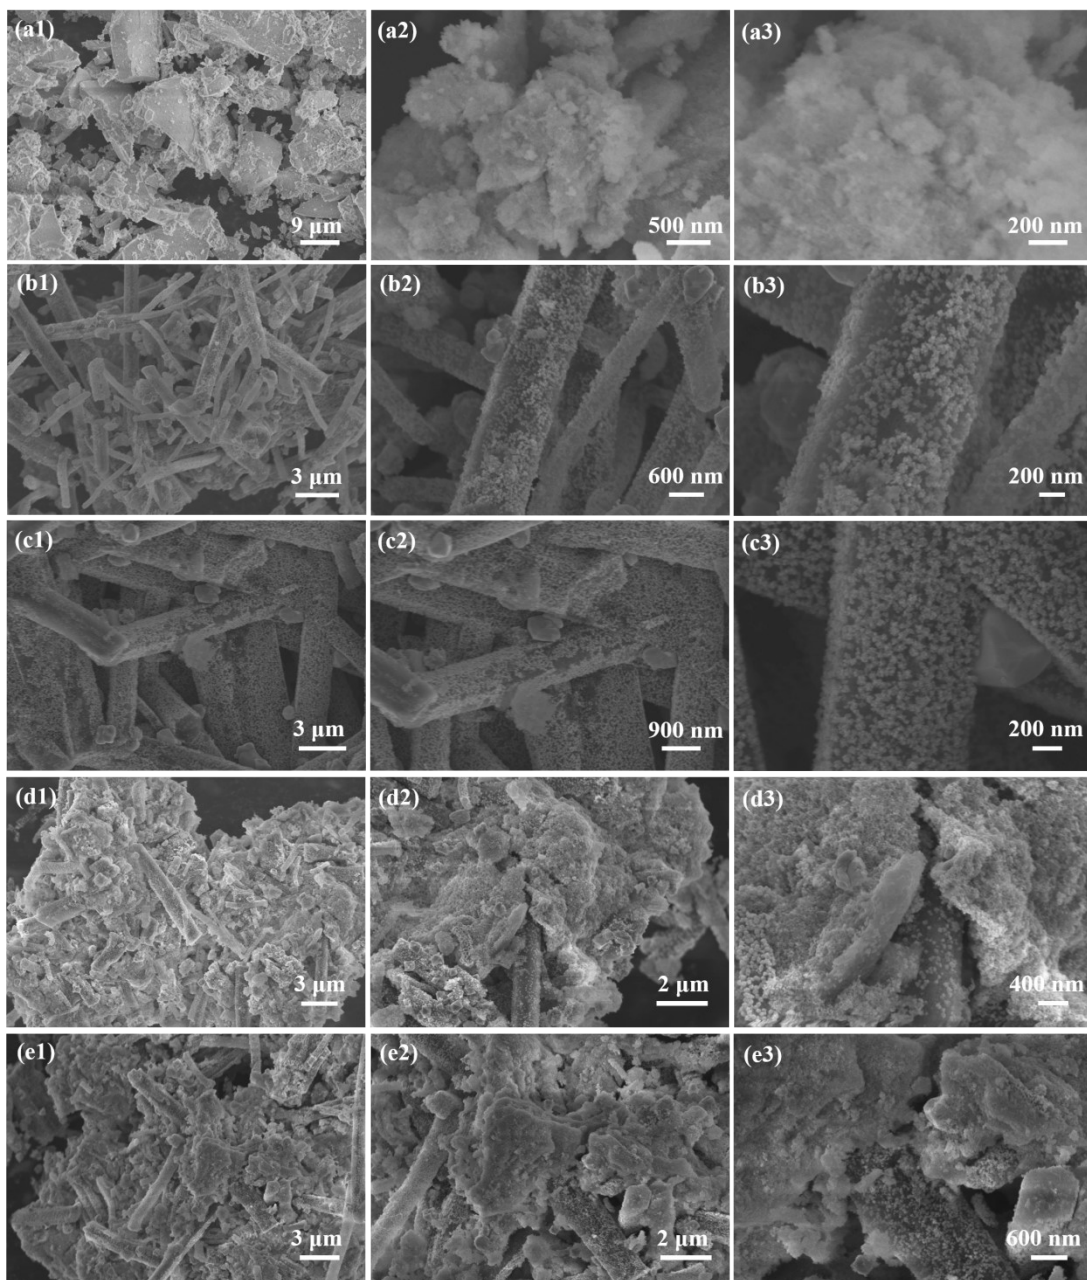

**Fig. S5** Typical SEM images of (a) CdS, (b) 1CdS/C-In<sub>2</sub>O<sub>3</sub>, (c) 3CdS/C-In<sub>2</sub>O<sub>3</sub>, (d) 7CdS/C-In<sub>2</sub>O<sub>3</sub>, (e) 9CdS/C-In<sub>2</sub>O<sub>3</sub>.

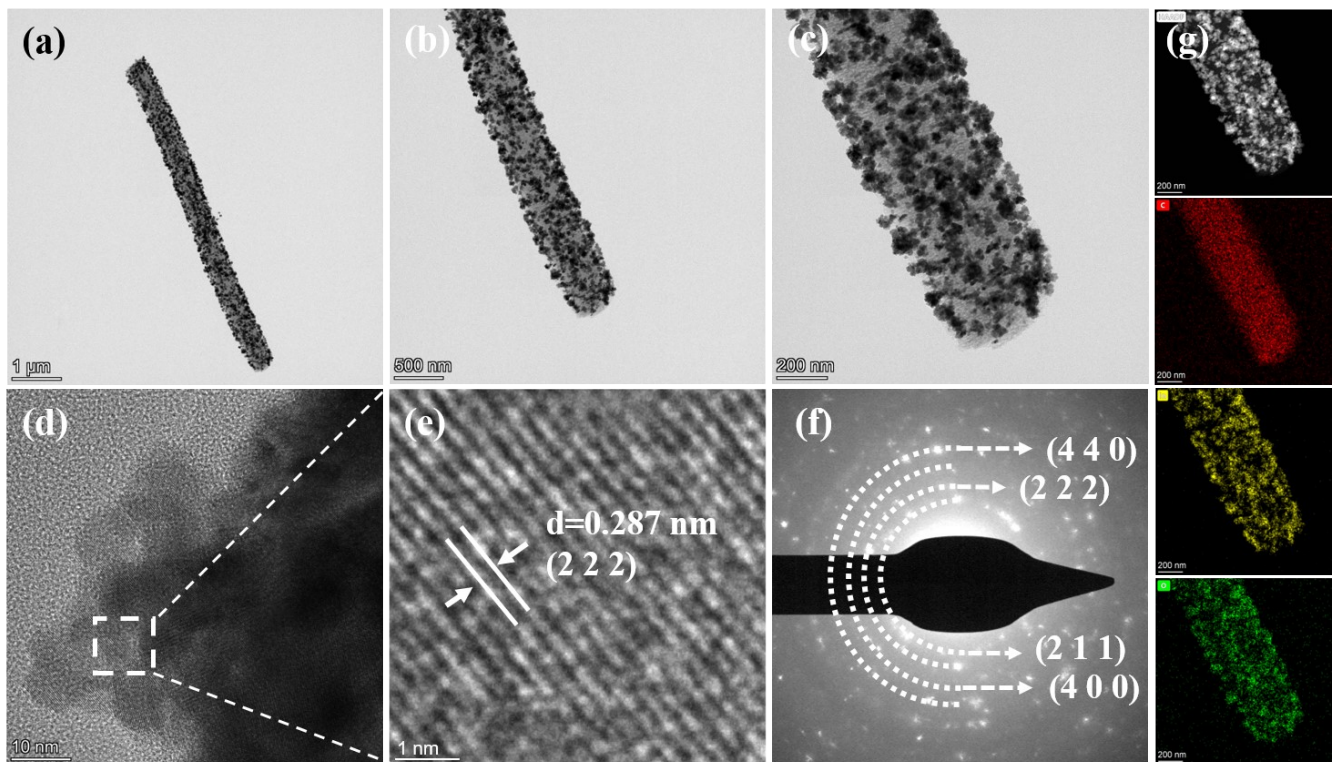

**Fig. S6** (a-d) Typical TEM images of C-In<sub>2</sub>O<sub>3</sub>. (e) Typical HRTEM images recorded from the marked area in (d). Corresponding (f) SAED spectrum of C-In<sub>2</sub>O<sub>3</sub>. (g) Elemental mappings corresponding to the selected area of C-In<sub>2</sub>O<sub>3</sub>.

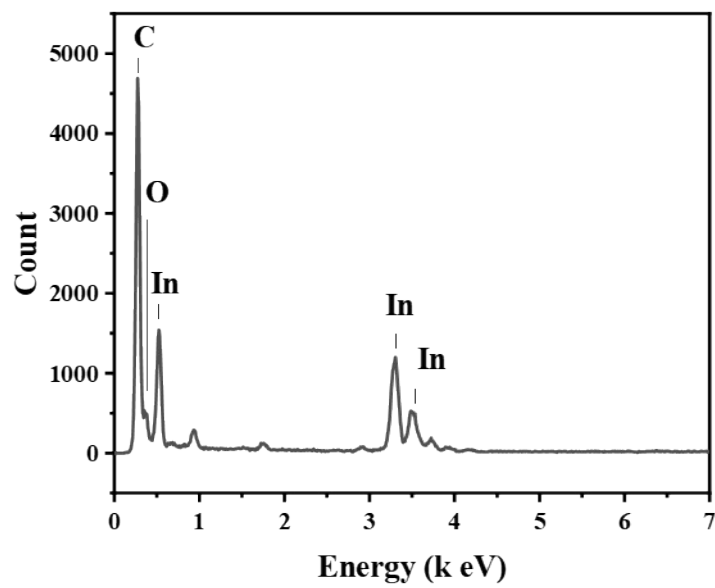

**Fig. S7** EDX spectrum of C-In<sub>2</sub>O<sub>3</sub>.

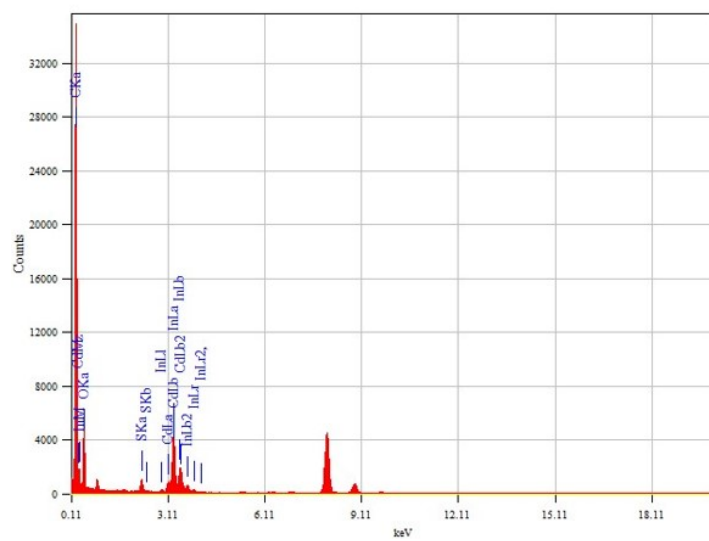

**Fig. S8** EDX spectrum of 5CdS/C-In<sub>2</sub>O<sub>3</sub>.

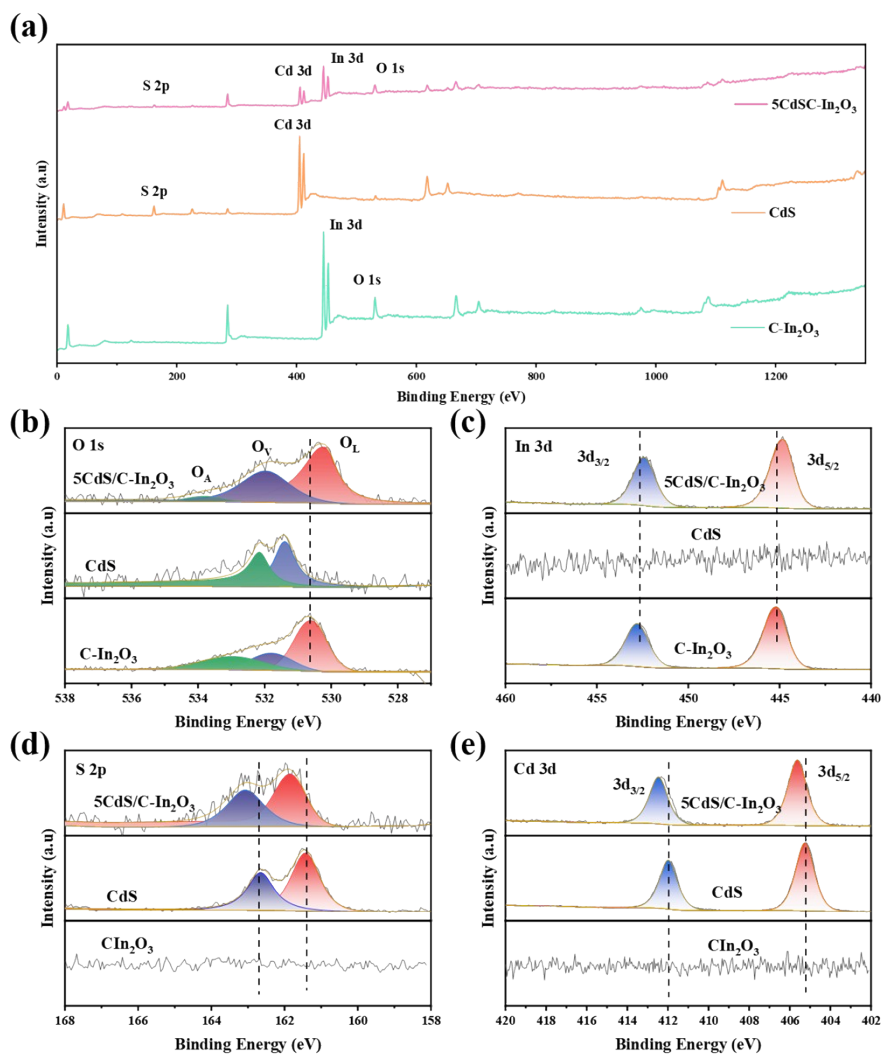

**Fig. S9** (a-d) XPS spectra of as-prepared C-In<sub>2</sub>O<sub>3</sub>, CdS and 5CdS/C-In<sub>2</sub>O<sub>3</sub>. (a-d) High-resolution XPS spectra of In 3d (a), O 1s (b), Cd 3d (c), S 2p (d) of as-prepared C-In<sub>2</sub>O<sub>3</sub>, CdS and 5 CdS/C-In<sub>2</sub>O<sub>3</sub>, respectively.

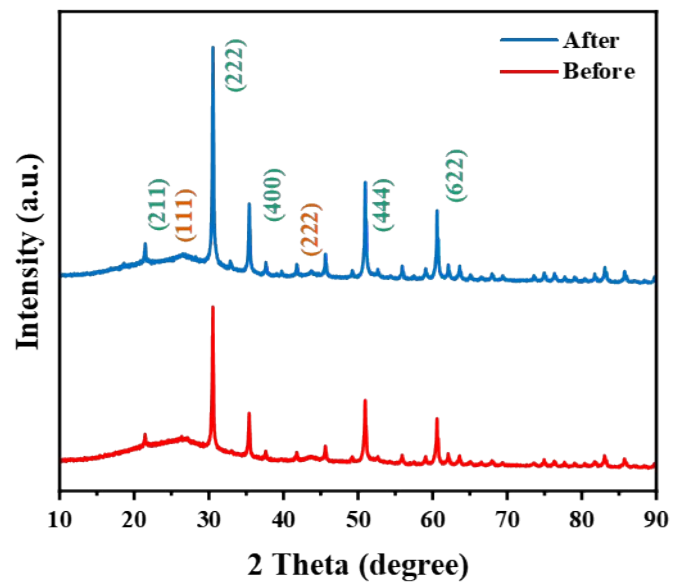

**Fig. S10** XRD spectra of 5CdS/C-In<sub>2</sub>O<sub>3</sub> after test.

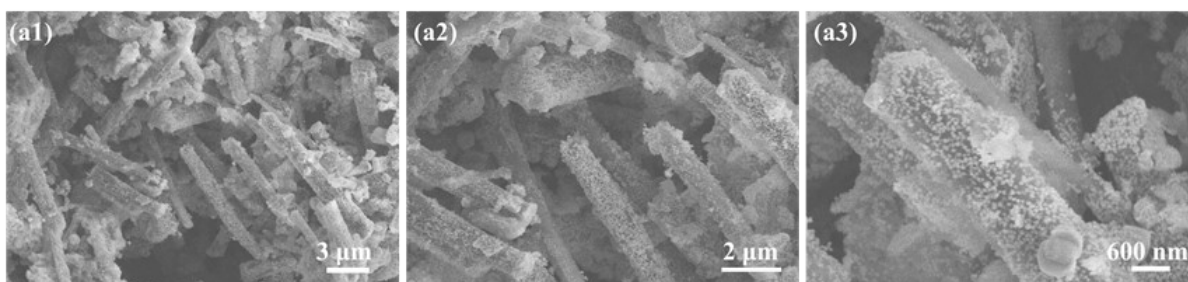

**Fig. S11** SEM image of 5CdS/C-In<sub>2</sub>O<sub>3</sub> after test.

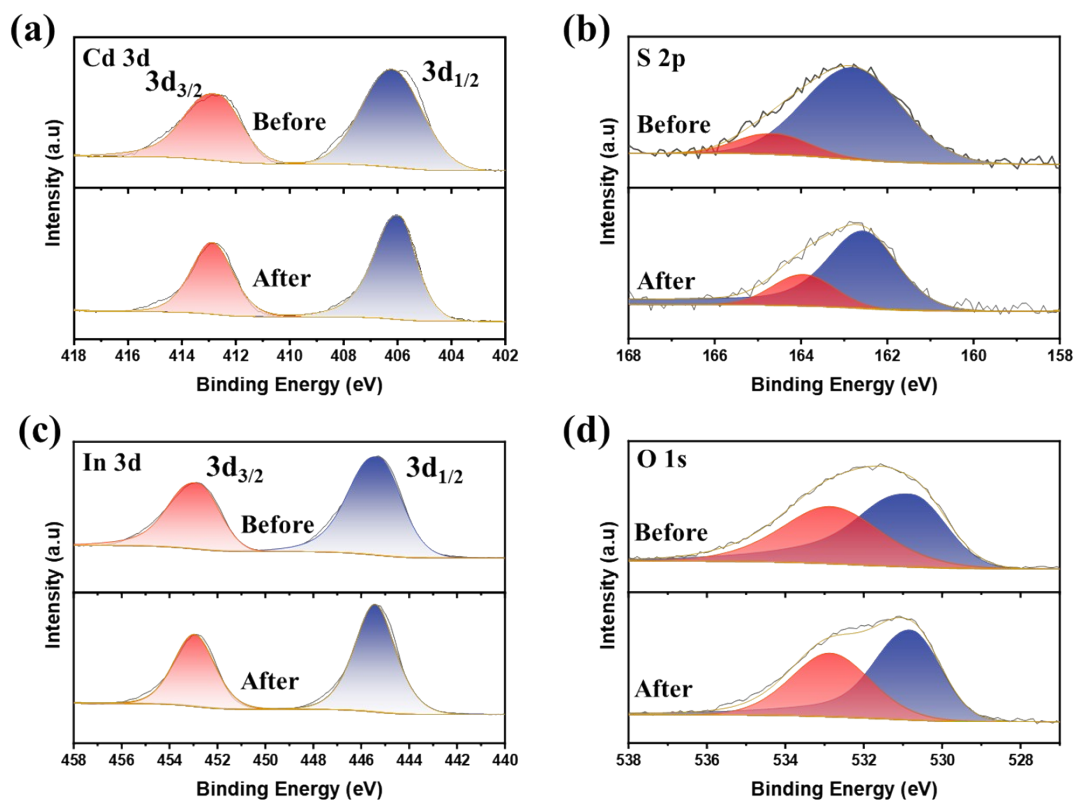

**Fig. S12** Comparison of XPS spectra of 5CdS/C-In<sub>2</sub>O<sub>3</sub> before and after the reaction. (a-d) High-resolution XPS spectra of Cd 3d (a), S 2p (b), In 3d (c), O 1s (d) of 5 CdS/C-In<sub>2</sub>O<sub>3</sub>, respectively.

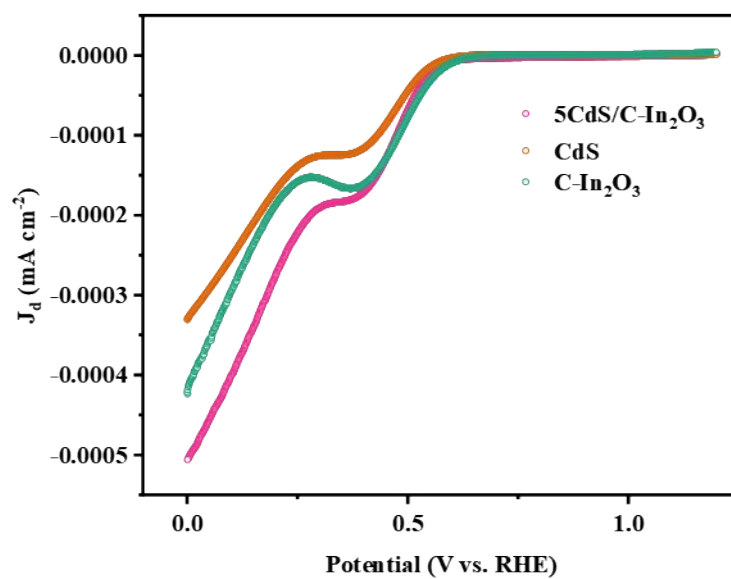

**Fig. S13** RRDE polarization curves over C-In<sub>2</sub>O<sub>3</sub>, CdS and 5CdS/C-In<sub>2</sub>O<sub>3</sub> in O<sub>2</sub>-saturated 0.1 M KOH (pH = 12.9) at 1600 rpm with ring current (upper part) and density of disk current.

**Table S1** experimental details for experimental details for AQY test

| wave length (nm) | H <sub>2</sub> O <sub>2</sub> yield (mol) | Time (s) | optical power density (W/cm <sup>2</sup> ) | Area (cm <sup>2</sup> ) | velocity of light C | Planck constant h | Number of incident photons | H <sub>2</sub> O <sub>2</sub> molecules | AQY (%)             |
|------------------|-------------------------------------------|----------|--------------------------------------------|-------------------------|---------------------|-------------------|----------------------------|-----------------------------------------|---------------------|
| 400              | 2.6976<br>4E-05                           | 3600     | 0.0126                                     | 7.065                   | 300000              | 6.626E-<br>34     | 6.44871<br>E+20            | 3.24795E<br>+19                         | 5.036<br>5994<br>55 |
| 450              | 2.1944<br>6E-05                           | 3600     | 0.0126                                     | 7.065                   | 300000              | 6.626E-<br>34     | 7.25479<br>E+20            | 2.64213E<br>+19                         | 3.641<br>9091<br>8  |
| 500              | 5.5402<br>8E-06                           | 3600     | 0.0118                                     | 7.065                   | 300000              | 6.626E-<br>34     | 7.54908<br>E+20            | 6.6705E+<br>18                          | 0.883<br>6172<br>24 |
| 550              | 2.3954<br>3E-06                           | 7200     | 0.0138                                     | 7.065                   | 300000              | 6.626E-<br>34     | 1.94229<br>E+21            | 2.88409E<br>+18                         | 0.148<br>4893<br>94 |

**Table S2** Comparison of photocatalytic H<sub>2</sub>O<sub>2</sub> production rate of CdS/C-In<sub>2</sub>O<sub>3</sub> heterostructure with recent reported photocatalysts.

| <b>Catalyst</b>                                                           | <b>H<sub>2</sub> Evolution<br/>(<math>\mu\text{mol}\cdot\text{g}^{-1}\cdot\text{h}^{-1}</math>)</b> | <b>Sacrificial<br/>agent</b>                                     | <b>Photosensitizer<br/>Cocatalyst</b> | <b>Light<br/>Source</b> | <b>Ref.</b> |
|---------------------------------------------------------------------------|-----------------------------------------------------------------------------------------------------|------------------------------------------------------------------|---------------------------------------|-------------------------|-------------|
| In <sub>2</sub> S <sub>3</sub> @In <sub>2</sub> O <sub>3</sub>            | 275                                                                                                 | \                                                                | \                                     | $\lambda \geq 420$ nm   | 1           |
| In <sub>2</sub> O <sub>3</sub> /ZnIn <sub>2</sub> S <sub>4</sub>          | 590                                                                                                 | \                                                                | \                                     | $\lambda \geq 420$ nm   | 2           |
| In <sub>2</sub> O <sub>3</sub> /ZnIn <sub>2</sub> S <sub>4</sub>          | 5716                                                                                                | 1 mM<br>Na <sub>2</sub> SO <sub>3</sub> and<br>Na <sub>2</sub> S | \                                     | $\lambda \geq 420$ nm   | 3           |
| Ag-ZnIn <sub>2</sub> S <sub>4</sub> /C-<br>In <sub>2</sub> O <sub>3</sub> | 2420                                                                                                | 10 vol%<br>isopropanol                                           | \                                     | $\lambda \geq 420$ nm   | 4           |
| This work                                                                 | 2343                                                                                                | isopropanol                                                      | \                                     | $\lambda \geq 420$ nm   |             |

**Table S3**  $\tau_1$  and  $\tau_2$  were fitted with the a biexponential decay model delivered form software and the

average lifetime ( $\tau_a$ ) was obtained using the equation:  $\tau_a = \frac{A_1\tau_1^2 + A_2\tau_2^2}{A_1\tau_1 + A_2\tau_2}$ .

| photocatalyst                         | $\tau_1$ | $\tau_2$ | $\tau_a$ |
|---------------------------------------|----------|----------|----------|
| C-In <sub>2</sub> O <sub>3</sub>      | 1.07     | 16.45    | 3.31     |
| CdS                                   | 1.60     | 22.30    | 4.64     |
| 5CdS/C-In <sub>2</sub> O <sub>3</sub> | 1.21     | 8.57     | 2.38     |

## References

1. X. Chen, W. Zhang, L. Zhang, L. Feng, C. Zhang, J. Jiang and H. Wang, *ACS Appl. Mater. Interfaces*, 2021, 13, 25868-25878.
2. S. Liu, Y. Mao, Q. Han and X. Liu, *Materials Science in Semiconductor Processing*, 2024, 170, 107978.
3. R. Bariki, K. Das, S. K. Pradhan, B. Prusti and B. G. Mishra, *ACS Appl. Energy Mater.*, 2022, 5, 11002-11017.
4. T. Lei, X. Zhan, Z. Yuan, Z. Wang, H. Yang, D. Zhang, Y. Li, W. Yang, G. Lin and H. Hou, *Sep. Purif. Technol.*, 2025, 359, 130474.
